# Supplementary material
Source: PubMed Central journal article supplement (PMC5588092)
Supplement: ac7b01282_si_001.pdf [file ac7b01282_si_001.pdf]

# Highly improved ESI-MS detection of G-quadruplex-folded oligonucleotides and their complexes with small molecules

M. Scalabrin,<sup>§</sup> M. Palumbo<sup>‡</sup> and S. N. Richter<sup>§\*</sup>

<sup>§</sup> *Department of Molecular Medicine, University of Padua, via Gabelli 63, 35121 Padua, Italy*

<sup>‡</sup> *Department of Pharmaceutical and Pharmacological Sciences, University of Padua, via Marzolo 5, 35131 Padua, Italy.*

## Table of Contents

|                                                                                 |         |
|---------------------------------------------------------------------------------|---------|
| <b>Table S1.</b> Oligonucleotides used in this study.                           | pag. 2  |
| <b>Figure S1.</b> Dichroic spectra of the tested G4 forming oligonucleotides    | pag. 3  |
| <b>Figure S2.</b> ESI-MS full spectra of the zoomed in spectra shown in Fig 1b. | pag. 4  |
| <b>Figure S3.</b> ESI-MS full spectra of the zoomed in spectra shown in Fig 2.  | pag. 9  |
| <b>Figure S4.</b> ESI-MS spectra of decreasing amounts of LTR-IV with B19       | pag. 10 |

**Table S1.** Oligonucleotides used in this study.

| <b>Name</b> | <b>Sequence 5'-3'</b>             |
|-------------|-----------------------------------|
| LTR-IV      | d(TGGGCGGGACTGGGGAGTGGT)          |
| LTR-III     | d(TGGGAGGCCTGGCCTGGGCGGGACTGGGGT) |
| un2         | d(GGGGGCGAGGGGCGGGAGGGGGCGAGGGG)  |
| hTel        | d(AGGGTTAGGGTTAGGGTTAGGG)         |
| c-myc       | d(TGGGGAGGGTGGGGAGGGTGGGGAAGG)    |

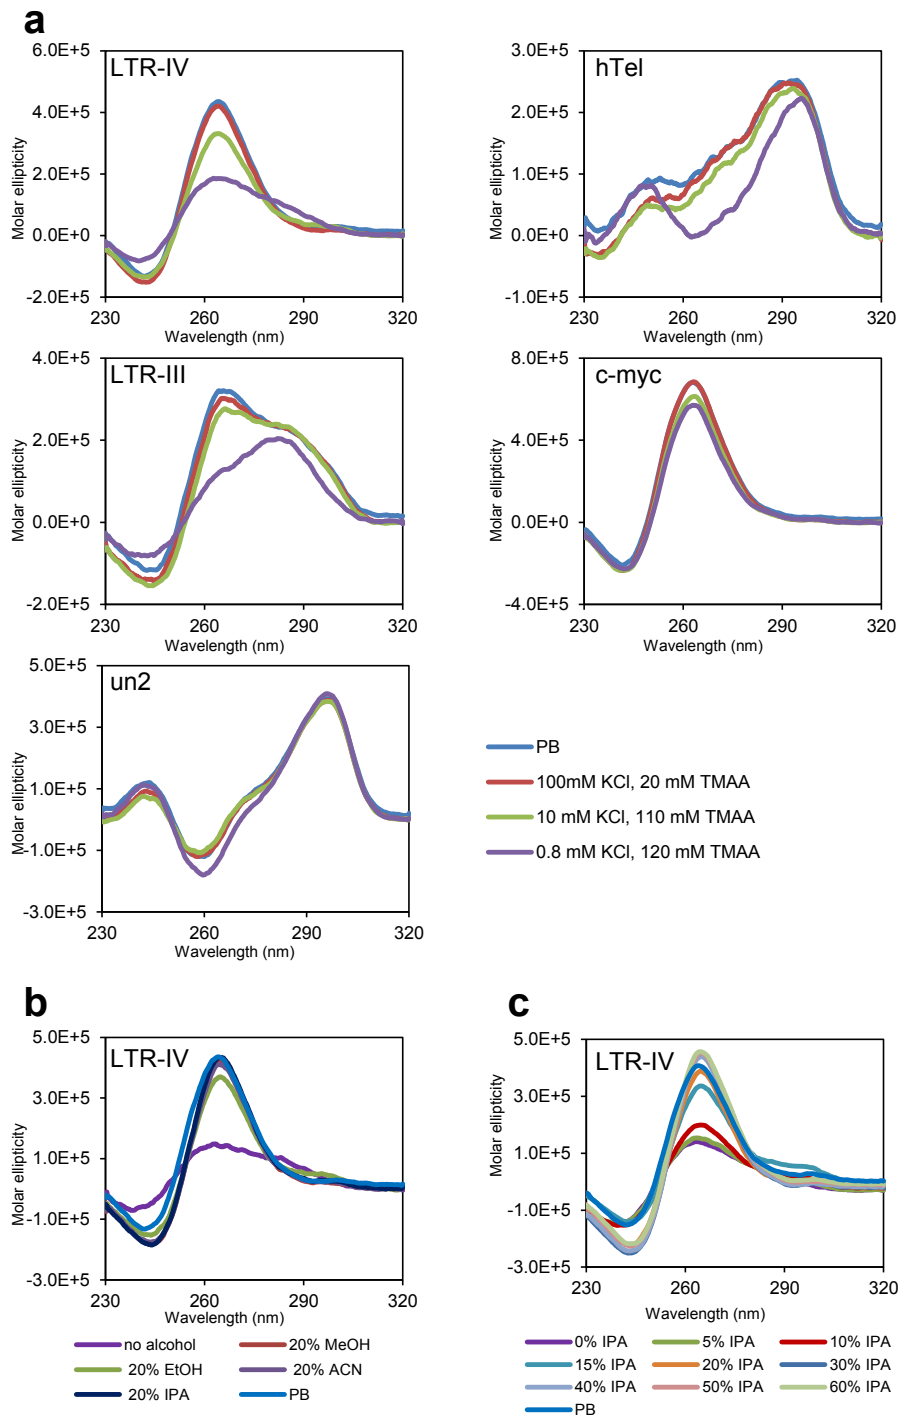

**Figure S1.** Dichroic spectra of the tested G4 forming oligonucleotides. a) CD spectra in 100 mM K<sup>+</sup>, 20 mM K<sub>2</sub>HPO<sub>4</sub>, pH 7.4 (PB) and TMAA buffers, pH 7.4, at different K<sup>+</sup> concentrations. b) CD spectra of LTR-IV in 0.8 mM K<sup>+</sup>, TMAA 120 mM, pH 7.4, in the presence of 20% of the indicated solvents. c) CD spectra of LTR-IV in 0.8 mM K<sup>+</sup>, TMAA 120 mM, pH 7.4, in the presence of the indicated % of IPA. In all panels the reference spectrum was measured in 100 mM K<sup>+</sup>, 20 mM K<sub>2</sub>HPO<sub>4</sub>, pH 7.4 (PB).

# LTR-IV

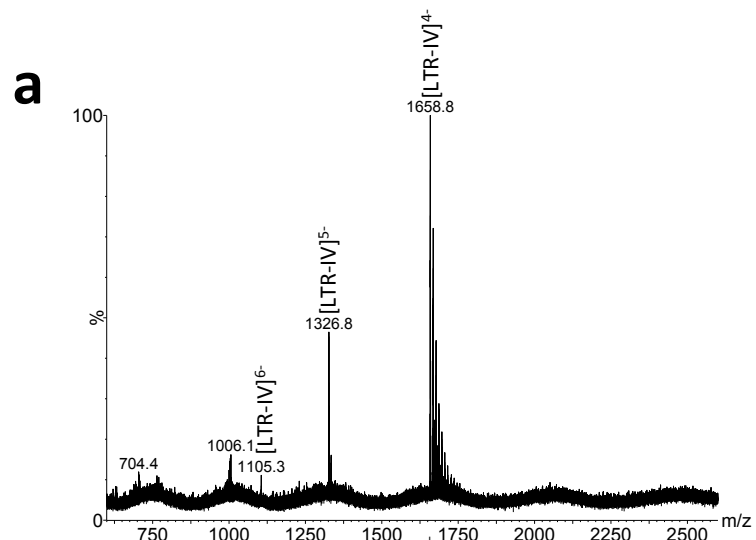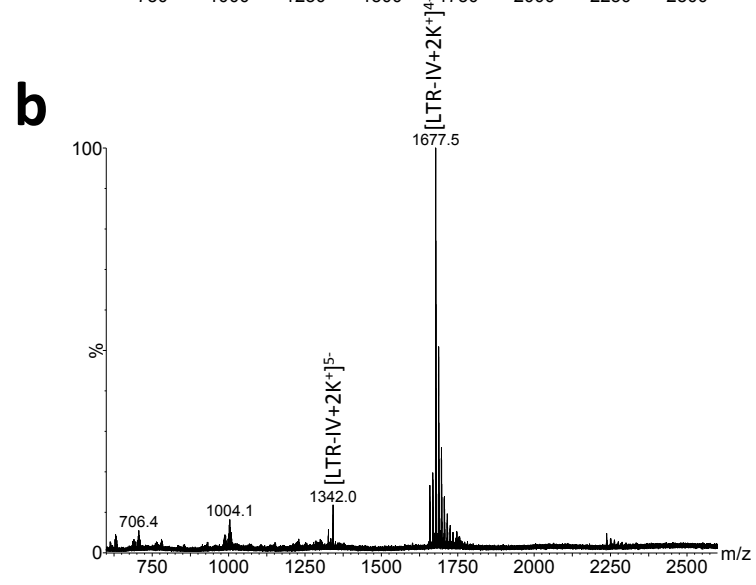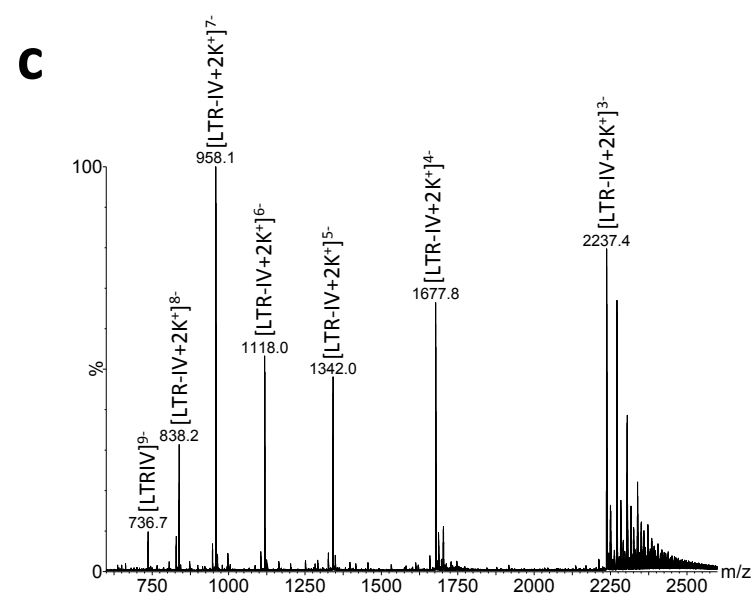

# LTR-III

**a**

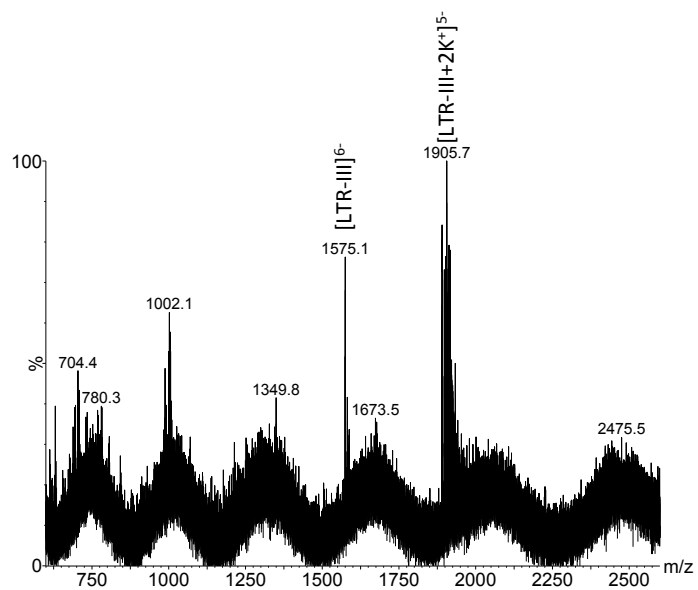

**b**

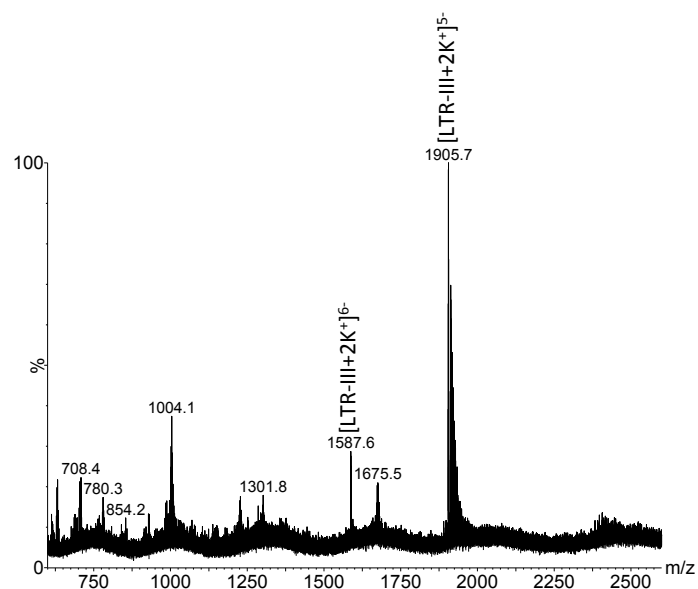

**c**

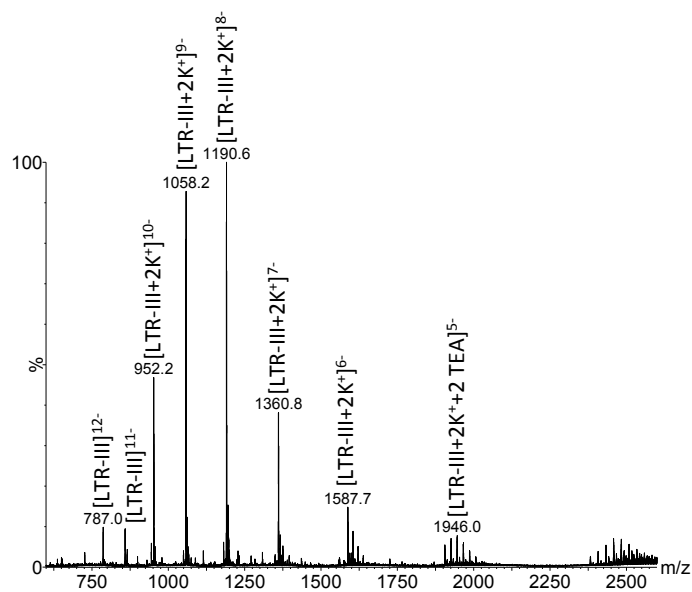

un-2

a

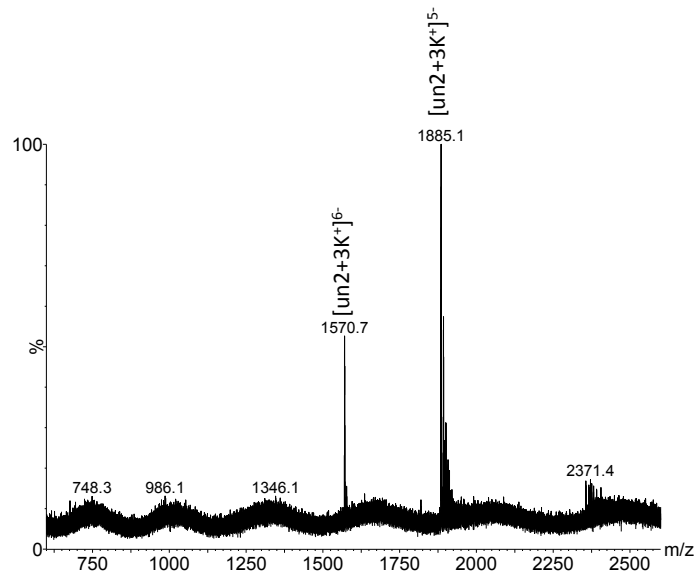

b

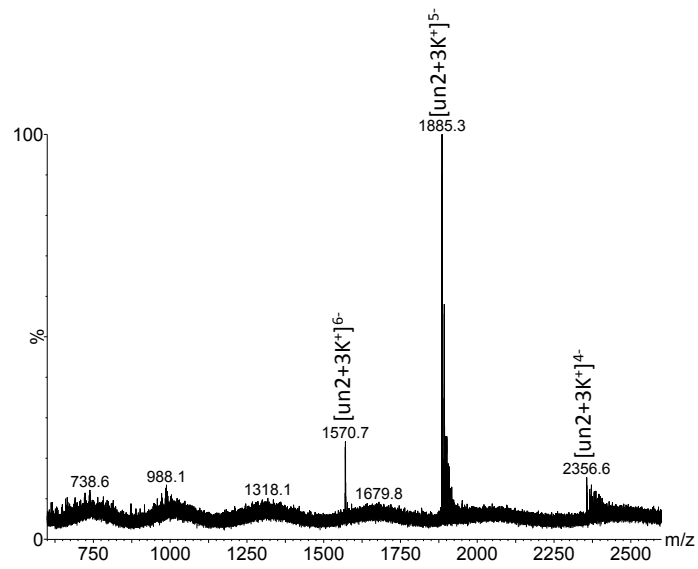

c

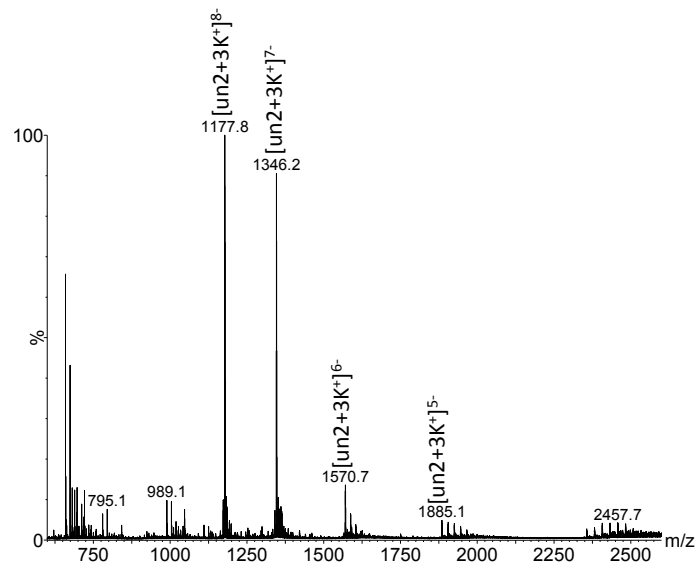

# hTel

**a**

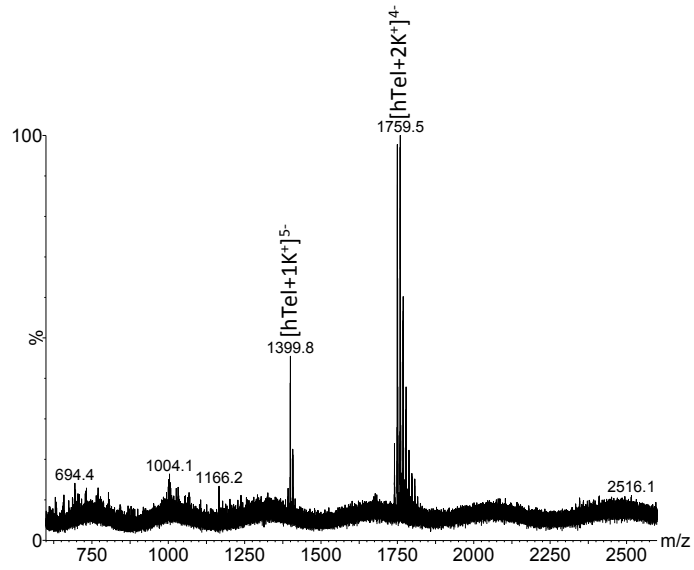

**b**

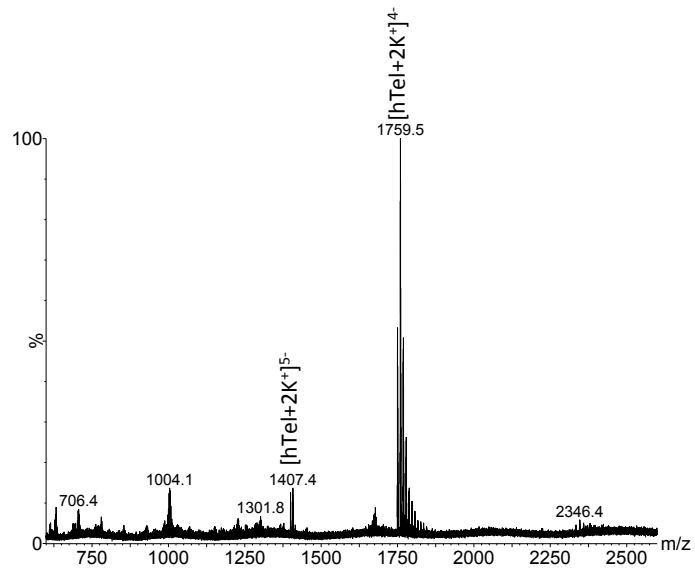

**c**

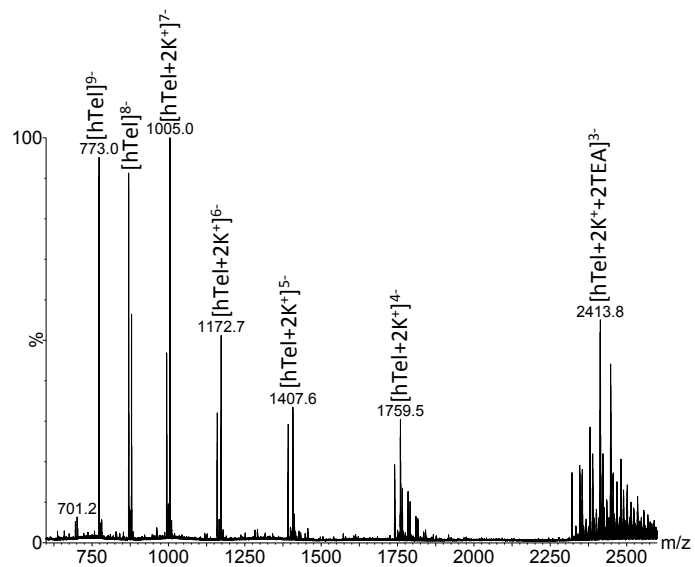

# c-myc

a

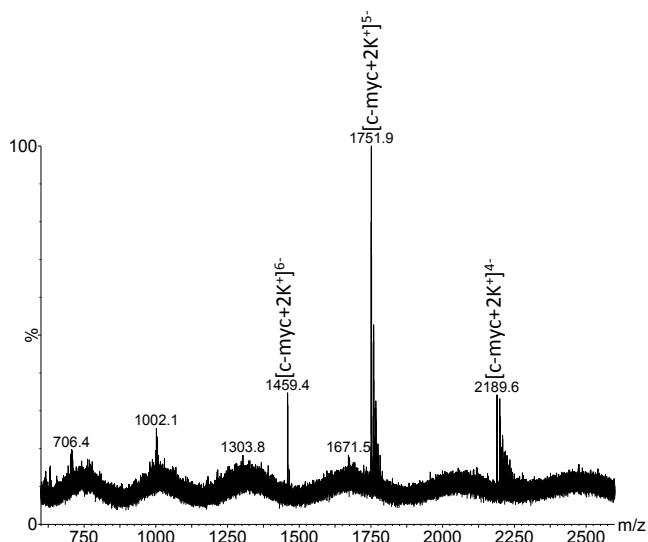

b

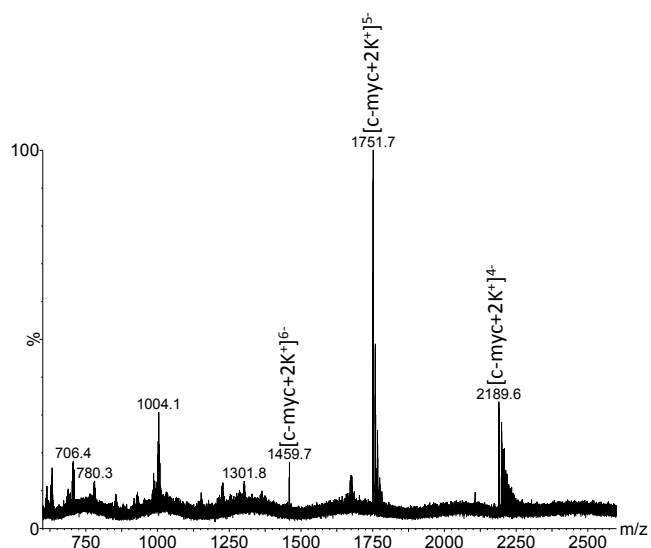

c

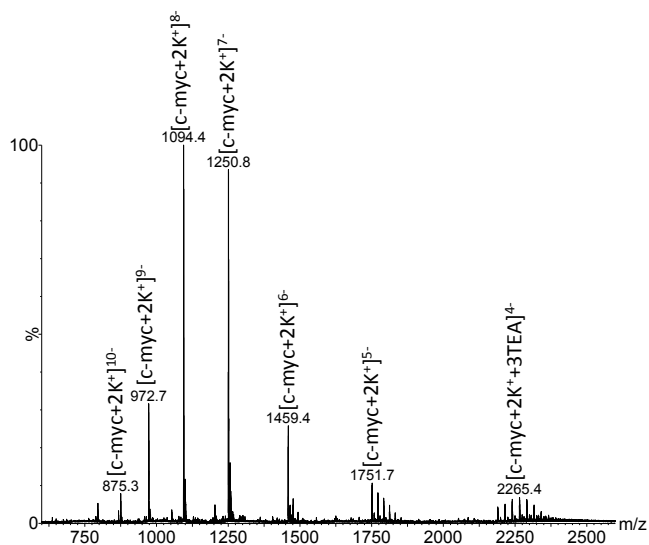

**Figure S2.** ESI-MS full spectra of the indicated oligonucleotides in a) 0.8 mM K<sup>+</sup>, 120 mM TMAA, b) 0.8 mM K<sup>+</sup>, 120 mM TMAA added of 20% IPA, c) 0.8 mM K<sup>+</sup>, TEA/120 mM HFIP added of 20% IPA. These are the full spectra of the zoomed spectra reported in Fig. 1b.



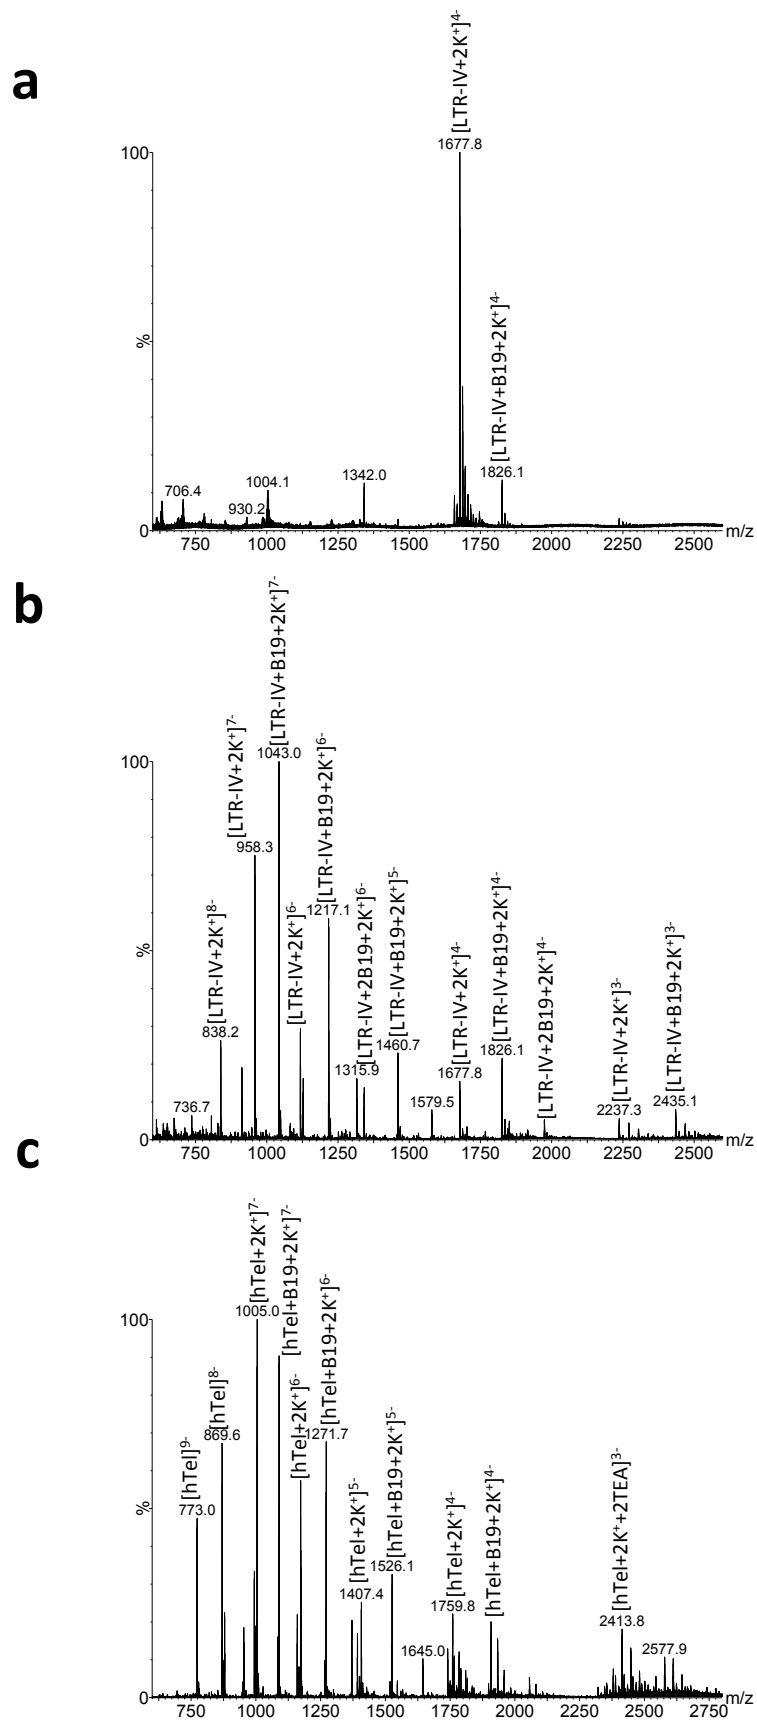

**Figure S3.** ESI-MS full spectra of the zoomed spectra reported in Fig. 2. a) LTR-IV + B19 molar ratio 1:2 in 120 mM TMAA pH 7.4 , 0.8 mM KCl, 20% IPA, b) LTR-IV + B19 molar ratio 1:2 in

TEA/120 mM HFIP pH 7.4 , 0.8 mM KCl, 20% IPA, c) hTel + B19 molar ratio 1:1 in TEA/120 mM HFIP pH 7.4 , 0.8 mM KCl, 20% IPA.

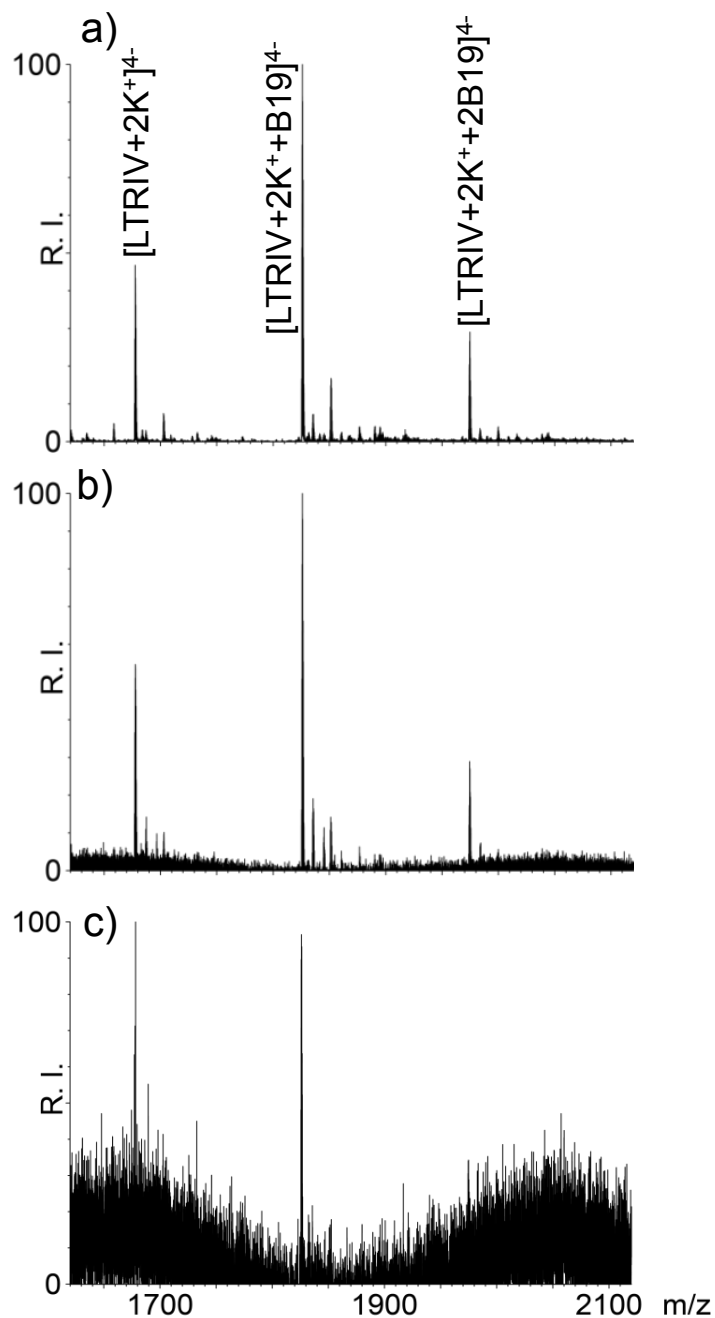

**Figure S4.** ESI-MS spectra of decreasing amounts of LTR-IV with B19. LTR-IV at different concentration, i.e. 4  $\mu\text{M}$  (a) 0.4  $\mu\text{M}$  (b) and 0.04  $\mu\text{M}$  (c) incubated with 2 equivalents of B19 in TEA/HFIP 120 mM pH 7.4, 0.8 mM KCl and 20% IPA.
